# Supplementary material for: Human mobility and urban malaria risk in the main transmission hotspot of Amazonian Brazil
Source: PLoS One. 2020 Nov 25;15(11):e0242357. doi: 10.1371/journal.pone.0242357 (PMC7688137; doi:10.1371/journal.pone.0242357)
Supplement: S1 File — (PDF) [file pone.0242357.s002.pdf]

[illegible]

13 - Ramal do Viola

- 14 - Área urbana de Cruzeiro do Sul  
15 - Paraná do Pentecostes  
16 - Ramal São Domingos  
17 - Pafé do Havaí  
18 - Aldeia Puyanawa  
19 - Ramal do Tiririca  
20 - Ramal do Generoso  
21 - Polo Agroflorestal  
77 - Outro local – onde?  
99 - Não sabe/ Não respondeu

[illegible]

### III. EXPOSIÇÃO

[illegible]

## Códigos

**Q43.01, Q43.11, Q43.21 Localidade:**

0 - Rio Moa – onde?

1 - Rio Japiim – onde?

## 2 - Rio Azul – onde?

3 - Ramal do 20

#### 4 - Ramal do Batoque

### 5 - Ramal do Feijão Insosso

6 - Ramal do Banho

7 - Igarapé Branco

## 8 - Igarapé da Bahia

9 - Ramal do Chaparral

10 - Timbauba

11 - Ramal dos

12 - UFAC

13 - Ramal

FC - Fátima de Almeida

14 - Área urbana de Cruzeiro do Sul

## 15 - Paraná do Pentecostes

16 - Ramal São Domingos

## 17 - Pafé do Havai

18 - Aldeia Puyanawa

19 - Ramal do Tiririca

20 - Ramal do Generoso

## 21 - Polo Agroflorestal

77 - Outro local – onde?

99 - Não sabe/ Não resp

66. While sales were reported:

[illegible]
